# Supplementary material
Source: Royal Society of Chemistry journal article supplement (doi:10.1039/d5ta10256a)
Supplement: d5ta10256a1.pdf [file d5ta10256a1.pdf]

## Supporting Information

Iron-induced formation of hierarchical open-cell hard carbon rich  
in oxygen functional groups for high-performance sodium ion  
storage

Liyuan Li, †\*<sup>ab</sup> Fenglian Gong, †<sup>b</sup> Huilin Li,<sup>b</sup> Chenyang Guo,<sup>b</sup> Jiaoyan Wang,<sup>b</sup> Yan Zhang<sup>b</sup>

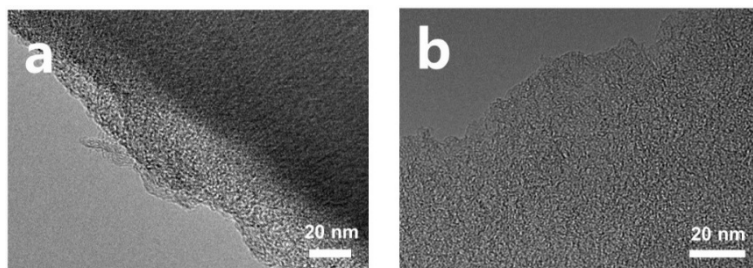

**Figure S1.** TEM images of a) JM and b) JM-Fe.

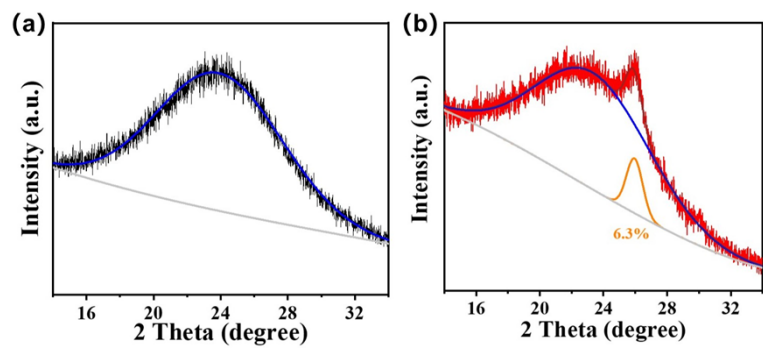

Figure S2. (a) Deconvolution of XRD patterns of (a) JM and (b) JM-Fe.

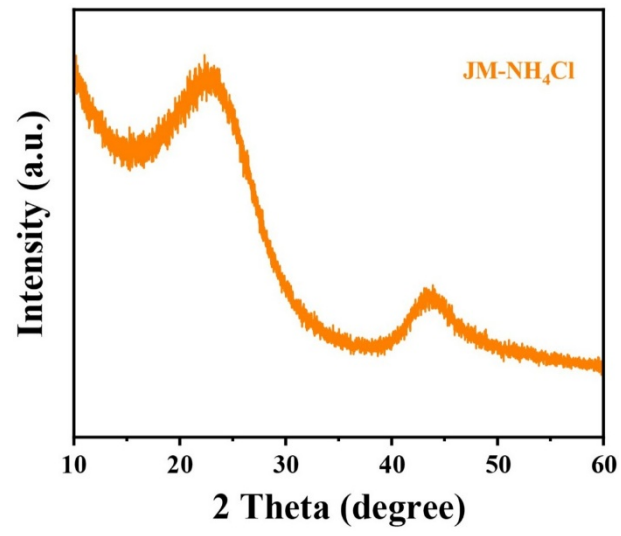

Figure S3. XRD pattern of JM-NH<sub>4</sub>Cl.

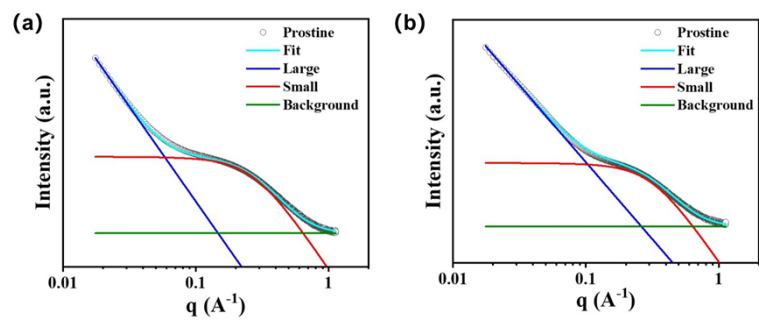

**Figure S4.** Fitted SAXS patterns. (a) SAXS patterns of JM. (b) SAXS patterns of JM-Fe.

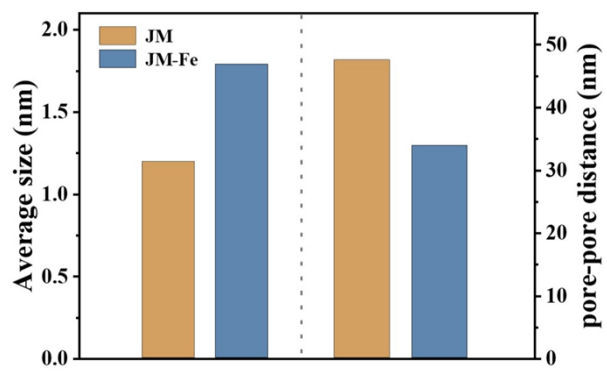

**Figure S5.** The average sizes and Pore-pore dimension for JM and JM-Fe.

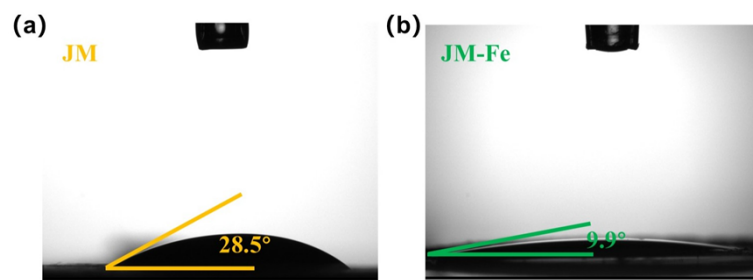

**Figure S6.** Electrolyte contact angle test of the JM and JM-Fe.

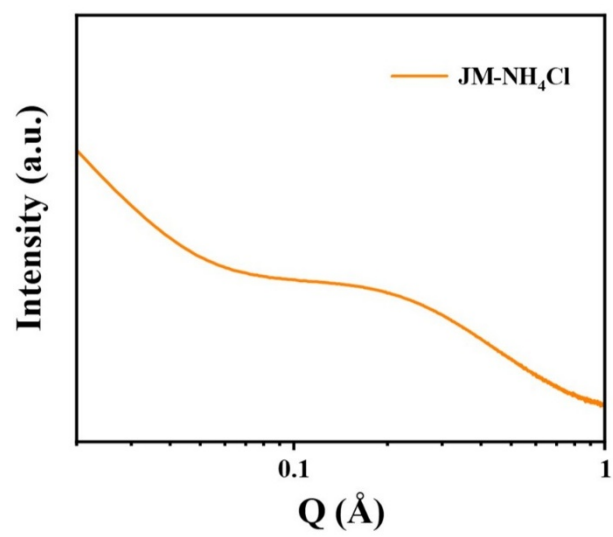

**Figure S7.** Small-angle X-ray scattering (SAXS) pattern of JM-NH<sub>4</sub>Cl.

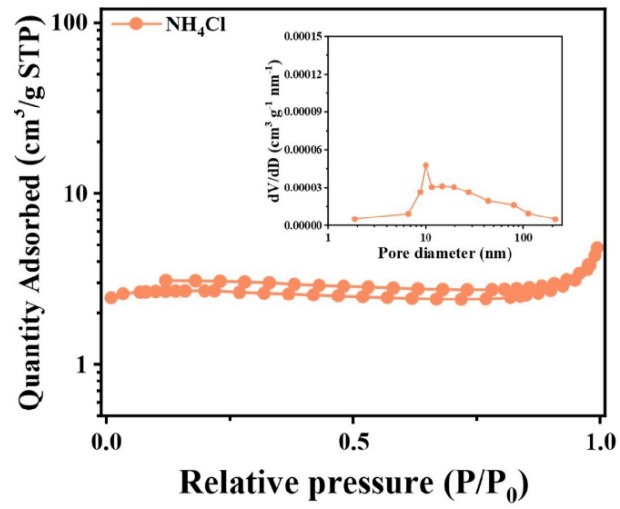

**Figure S8.** N<sub>2</sub> adsorption/desorption isotherm and Pore size distribution of JM-NH<sub>4</sub>Cl.

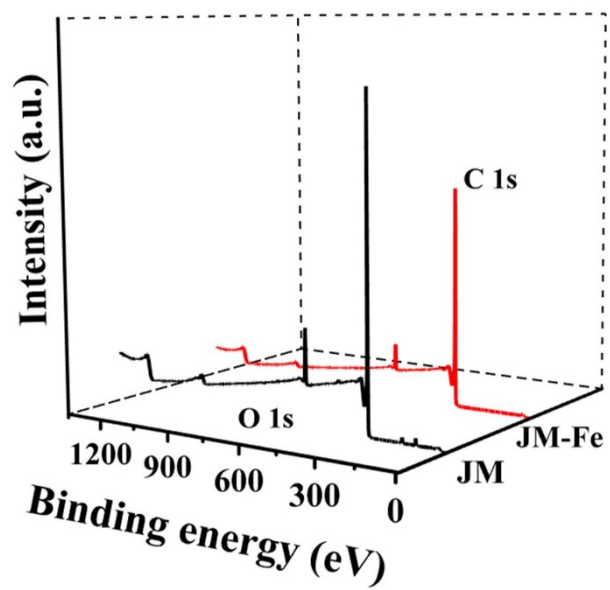

Figure S9. The survey spectra in JM and JM-Fe.

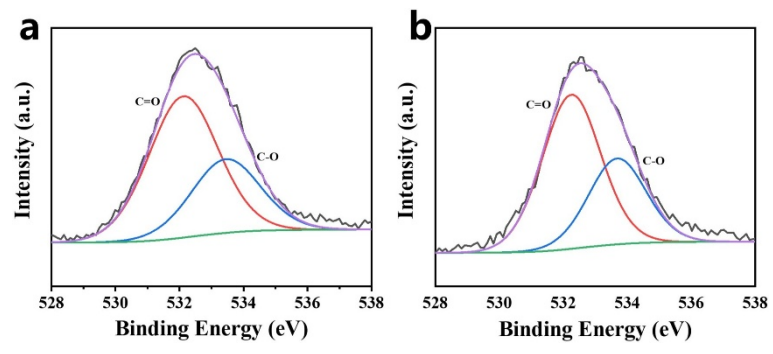

**Figure S10.** The survey spectra in JM and JM-Fe.

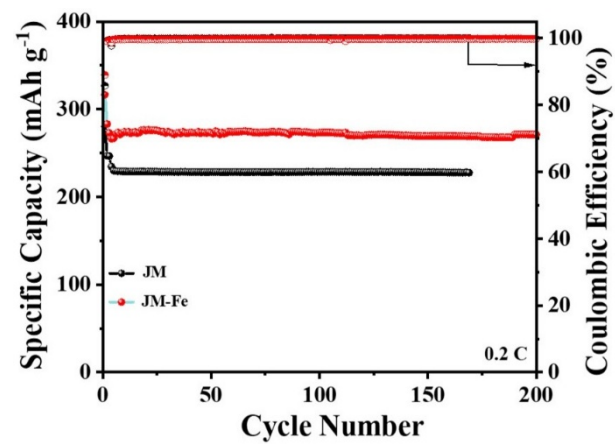

**Figure S11.** Cycling performance at 0.2 C of JM and JM-Fe.

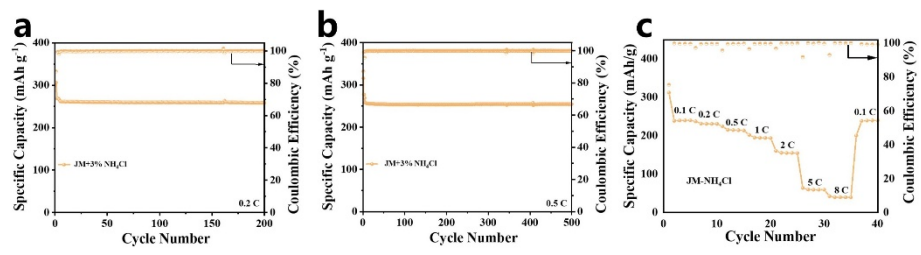

**Figure S12.** Cycling performance at a) 0.2 C and b) 0.5C of JM-NH<sub>4</sub>Cl. c) Rate capability of JM-NH<sub>4</sub>Cl.

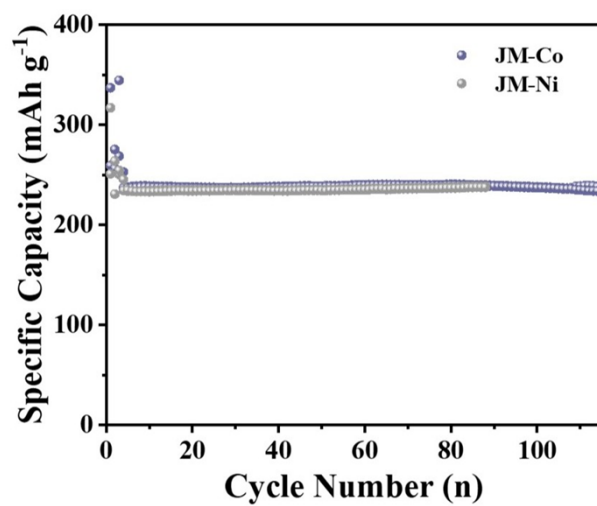

**Figure S13.** Cycling performance at 0.5 C of JM-Ni and JM-Co.

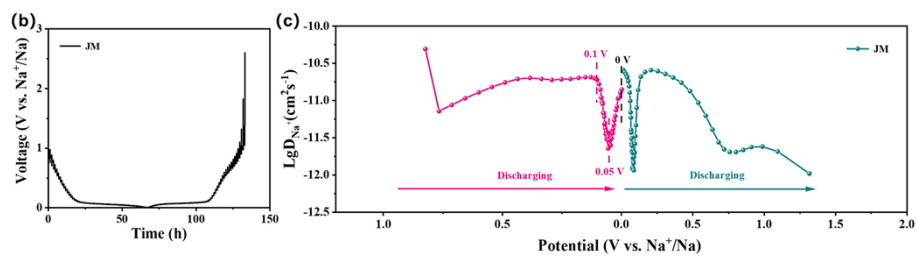

**Figure S14.** (a) GITT curve of JM and (b) Na<sup>+</sup> diffusion coefficient through discharging/charging process.

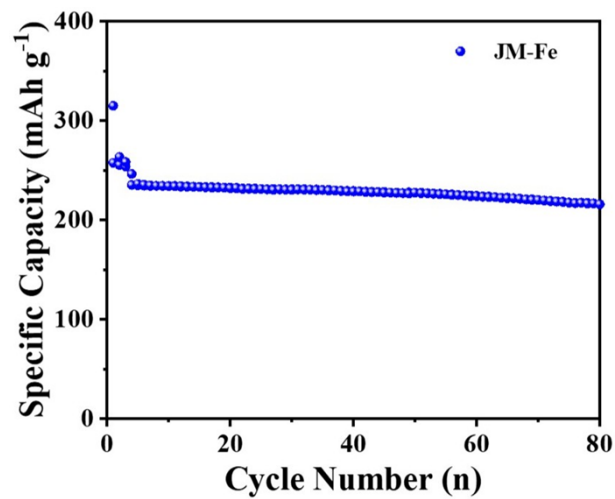

**Figure S15.** Cycling Performance of the JM-Fe at 0.5 C in Ester-Based Electrolytes.

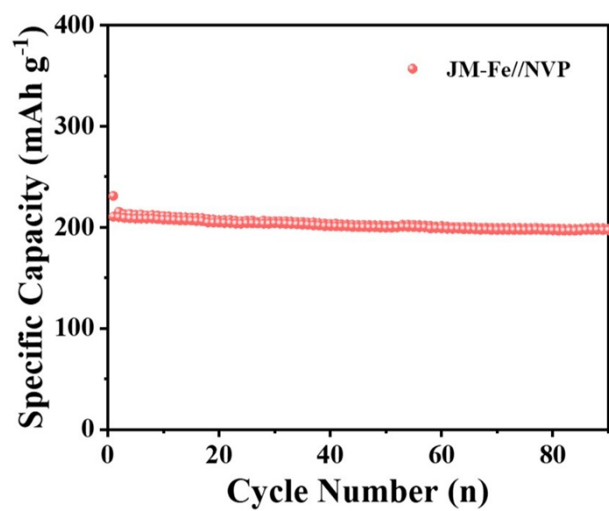

**Figure S16.** The cycling performance of NVP//JM-Fe full-cell tested at 0.5 C.

**Table S1.** Data extracted from various analyses

| Materials    | $S_{\text{BET}}$<br>( $\text{m}^2 \text{g}^{-1}$ ) | Pore volume<br>( $\text{cm}^3 \text{g}^{-1}$ ) | Average pore size<br>(nm) | $I_D/I_G$ | d(002) (nm) | Initial discharge capacity<br>( $\text{mAh g}^{-1}$ ) | Sloping capacity<br>( $\text{mAh g}^{-1}$ ) | Plateau capacity<br>( $\text{mAh g}^{-1}$ ) |
|--------------|----------------------------------------------------|------------------------------------------------|---------------------------|-----------|-------------|-------------------------------------------------------|---------------------------------------------|---------------------------------------------|
| <b>JM</b>    | 12.8                                               | 0.011                                          | 3.42                      | 1.02      | 0.369       | 320.0                                                 | 139.6                                       | 180.4                                       |
| <b>JM-Fe</b> | 67.6                                               | 0.059                                          | 3.51                      | 0.98      | 0.387       | 297.4                                                 | 126                                         | 171.4                                       |
